# Supplementary material for: The Role of Cannabis sativa L. as a Source of Cannabinoids against Coronavirus 2 (SARS-CoV-2): An In Silico Study to Evaluate Their Activities and ADMET Properties
Source: MDPI journal article supplement (doi:10.3390/molecules27092797), 2022-04-27

## Supplementary material

# The role of *Cannabis sativa* L as a Source of Cannabinoids against Coronavirus 2 (SARS-CoV-2): An *in Silico* Study to Evaluate their Activities and ADMET Properties

**Figure S1** 2D and 3D binding of cannabinolic acid (**A**) and cannabinol (**B**) within the active sites of SARS-CoV-2 M<sup>Pro</sup>

**Figure S2** 2D and 3D binding of cannabinolic acid (**A**) and cannabicyclic acid (**B**) within the active sites of SARS-CoV-2 PL<sup>Pro</sup>

**Figure S3** 2D and 3D binding of cannabinolic acid (**A**) and cannabinol (**B**) within the active sites of ACE-2

**Figure S4** The presence cannabichromanon (**32**) inside the binding pockets of SARS-CoV-2 M<sup>Pro</sup> (**A**), SARS-CoV-2 PL<sup>Pro</sup> (**B**) and ACE-2 (**C**) displaying areas of aromaticity, hydrogen bond formation, hydrophobicity and solvent accessibility (SAS) of the receptor residues

**Figure S5** 2D binding modes of the respective co-crystalized ligands in SARS-CoV-2 M<sup>Pro</sup> (**A**), SARS-CoV-2 PL<sup>Pro</sup> (**B**) and ACE2 (**C**)

**Figure S6** 2D binding modes of remdesivir in SARS-CoV-2 M<sup>Pro</sup> (**A**), SARS-CoV-2 PL<sup>Pro</sup> (**B**) and ACE2 (**C**)

**Figure S1** 2D and 3D binding of cannabinolic acid **(A)** and cannabinol **(B)** within the active sites of SARS-CoV-2 M<sup>Pro</sup>

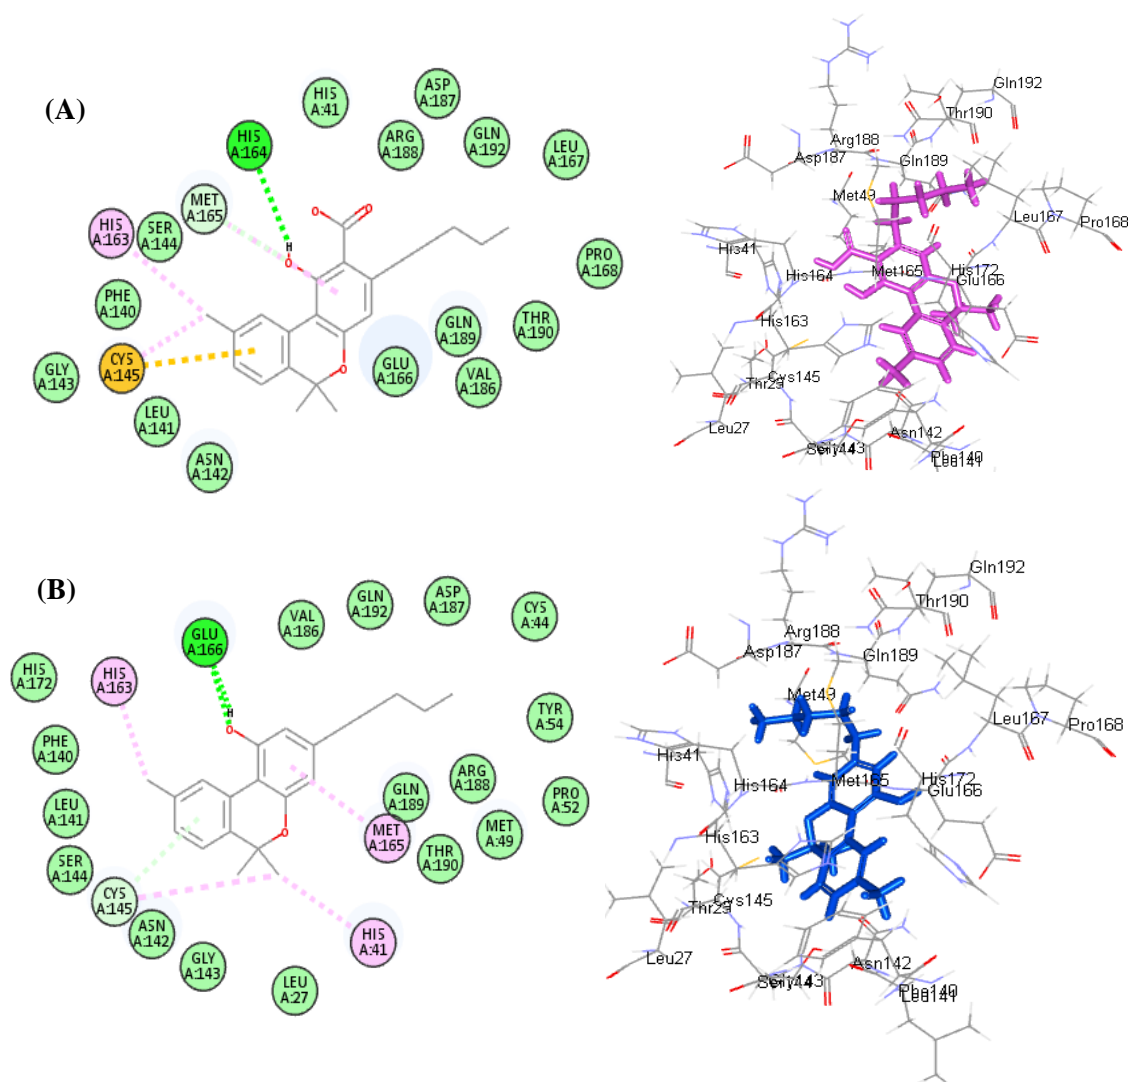

**Figure S2** 2D and 3D binding of cannabinolic acid **(A)** and cannabicyclic acid **(B)** within the active sites of , SARS-CoV- 2PL<sup>pro</sup>

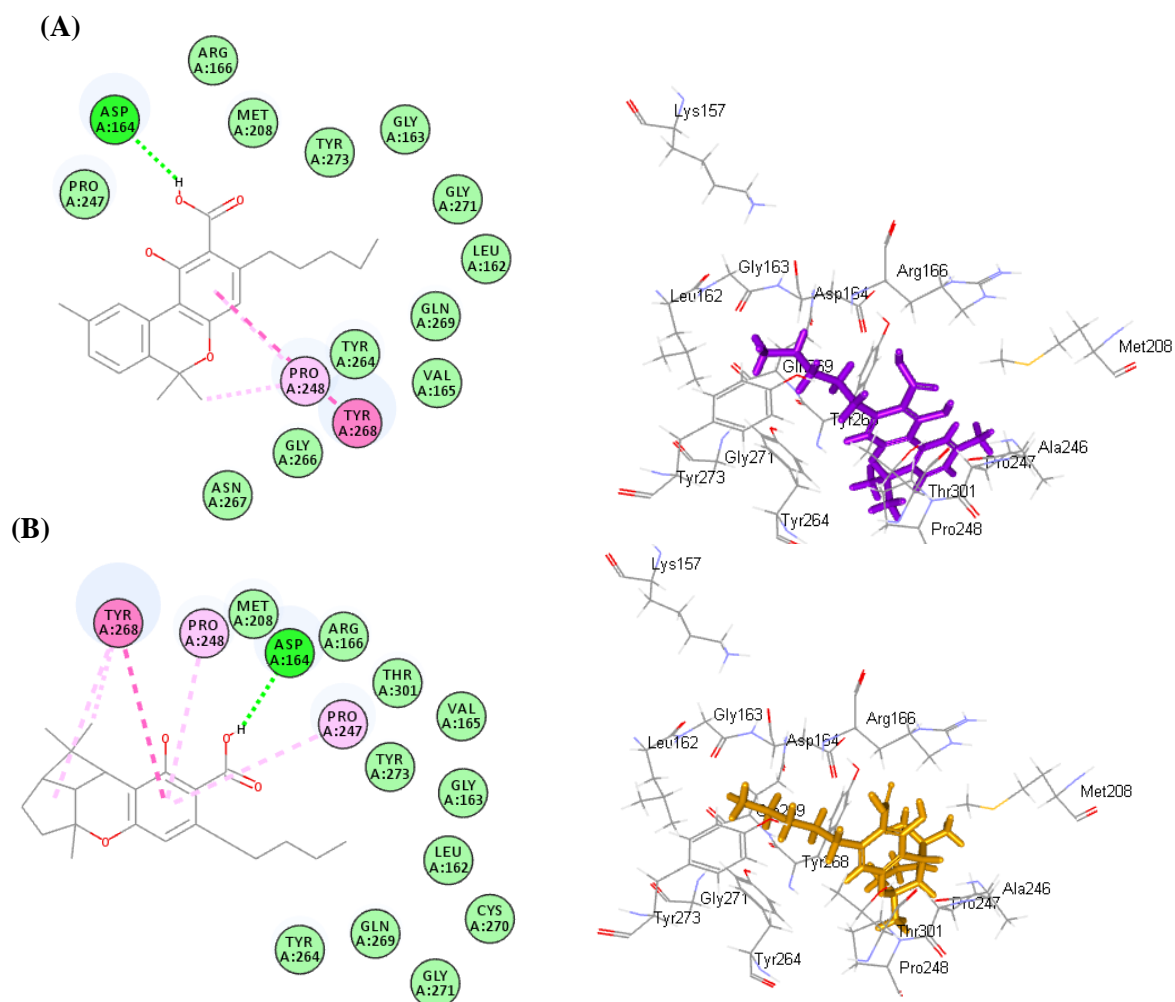

**Figure S3** 2D and 3D binding of cannabinolic acid **(A)** and cannabinol **(B)** within the active sites of ACE-2

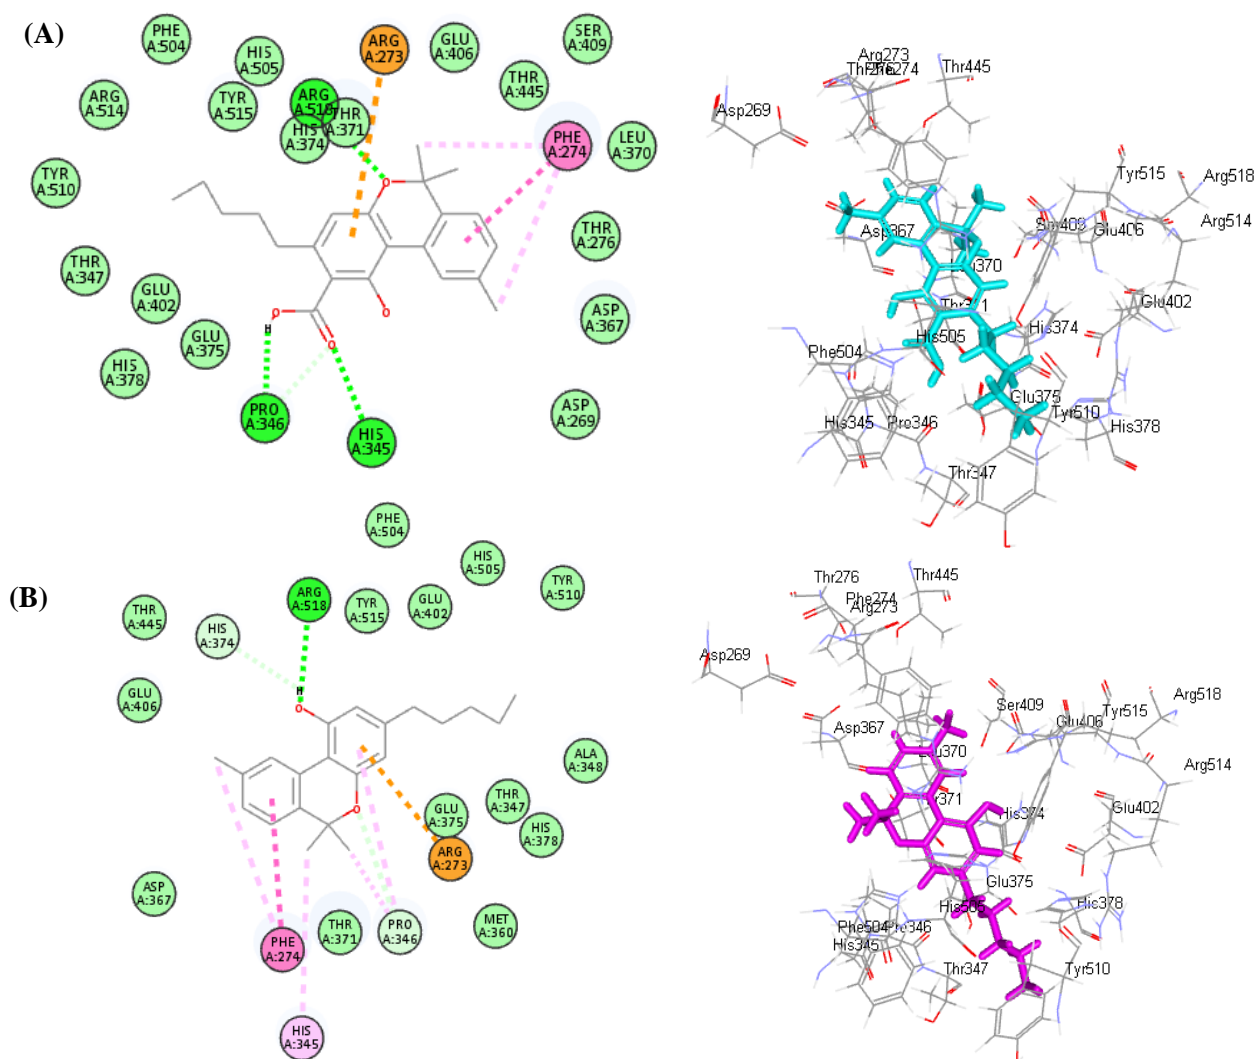

**Figure S4** The presence cannabichromanon (**32**) inside the binding pockets of SARS-CoV-2 M<sup>Pro</sup> (A), SARS-CoV-2 PL<sup>Pro</sup> (B) and ACE-2 (C) displaying areas of aromaticity, hydrogen bond formation, hydrophobicity and solvent accessibility (SAS) of the receptor residues

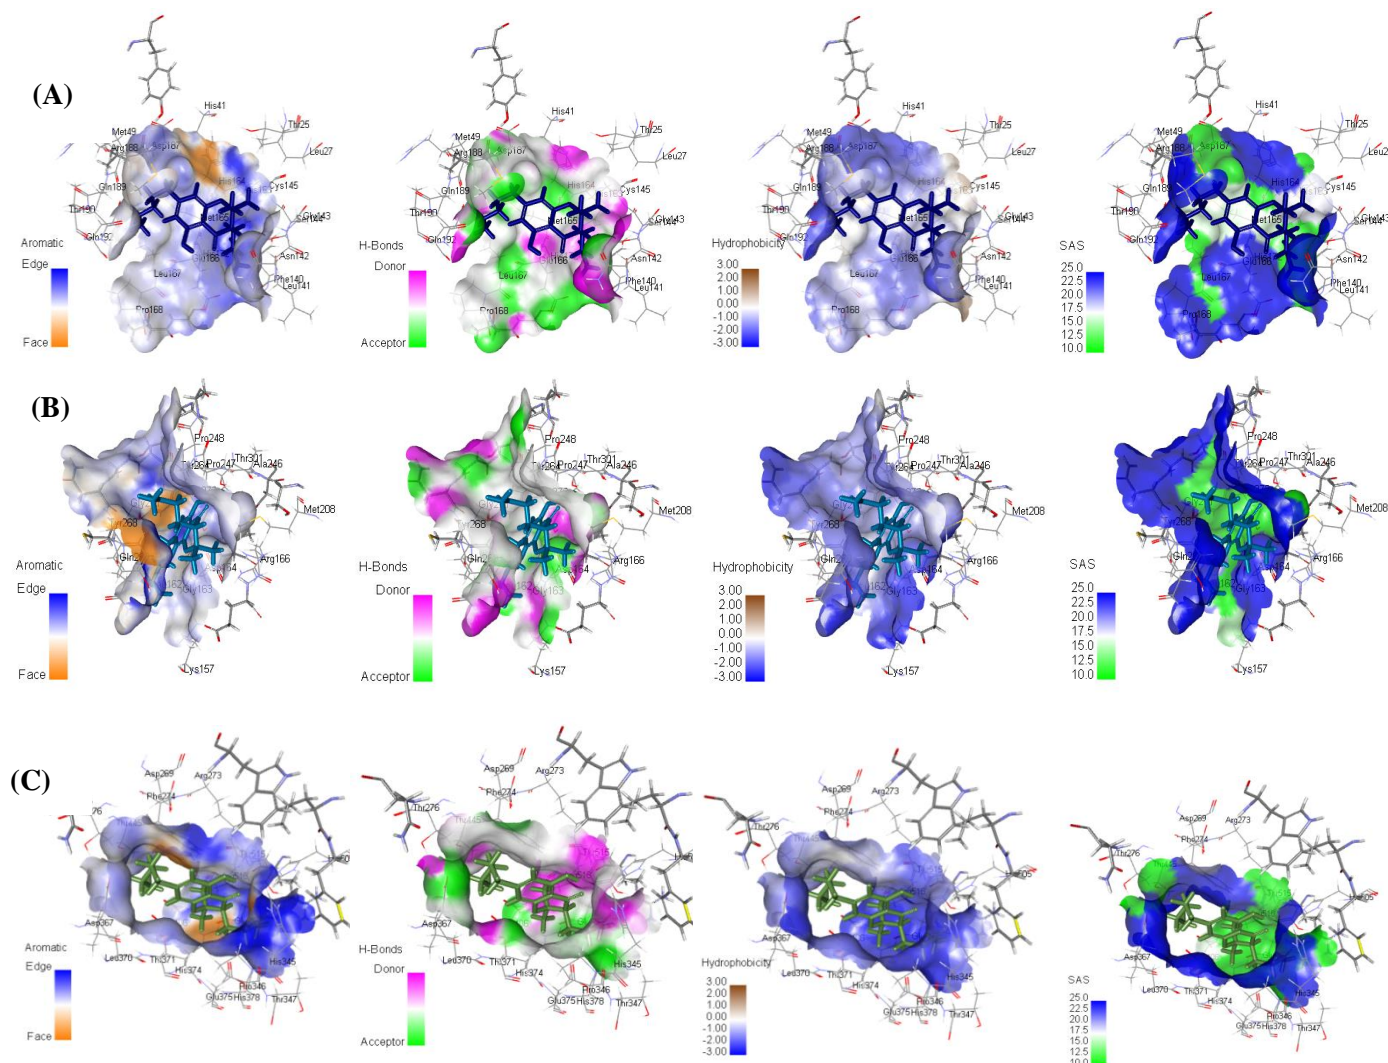

**Figure S52D** binding modes of the respective co-crystallized ligands in SARS-CoV-2 M<sup>Pro</sup> **(A)**, SARS-CoV-2 PL<sup>pro</sup> **(B)** and ACE2 **(C)**

**(A)**

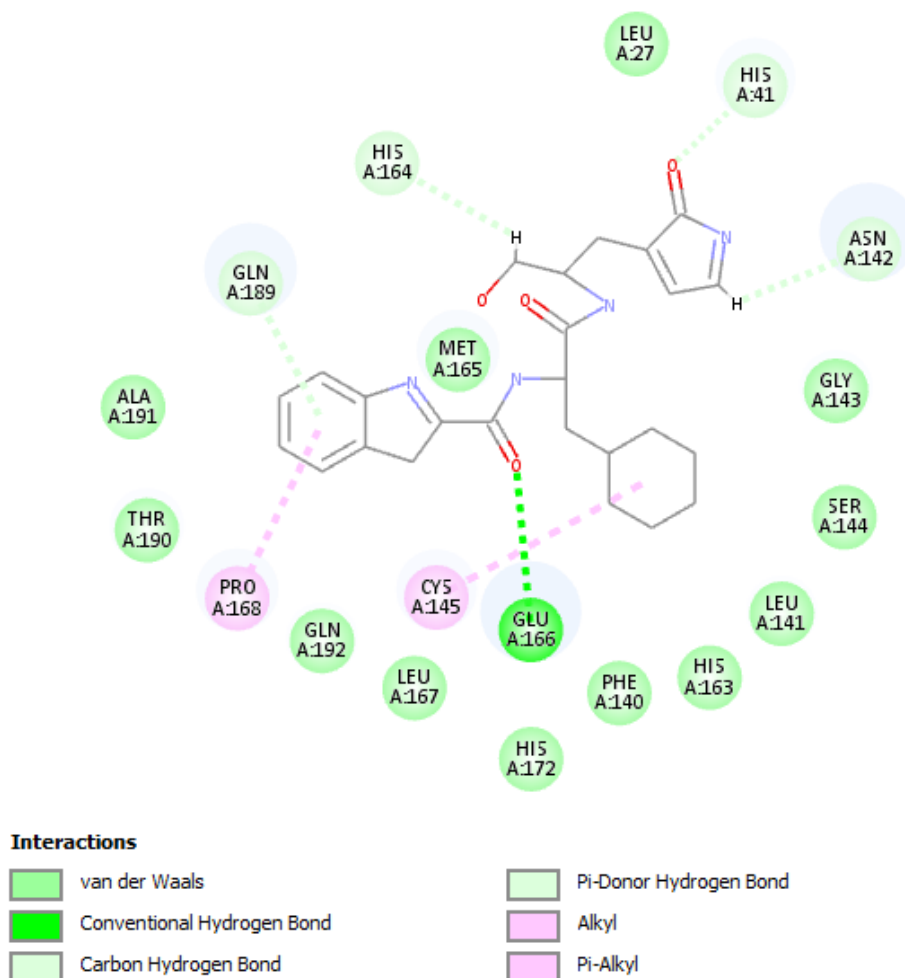

(B)

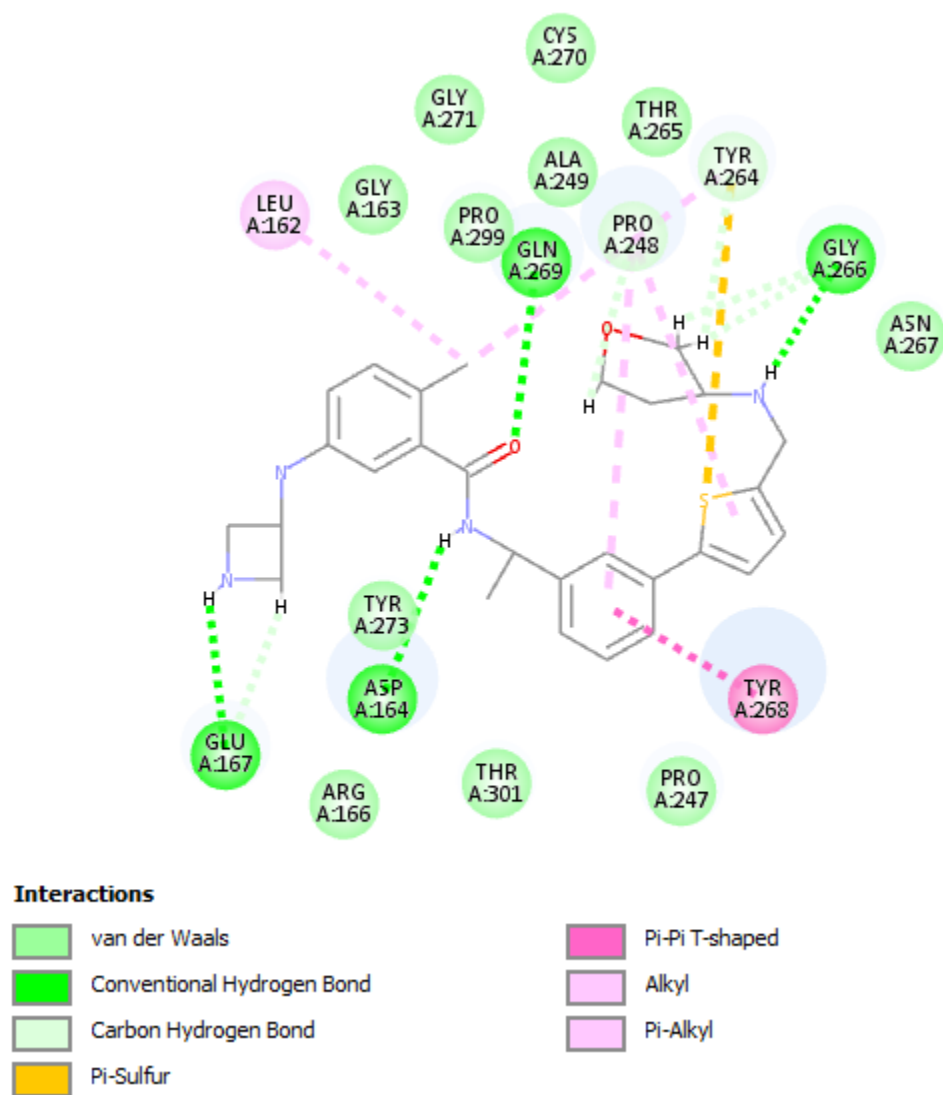

(C)

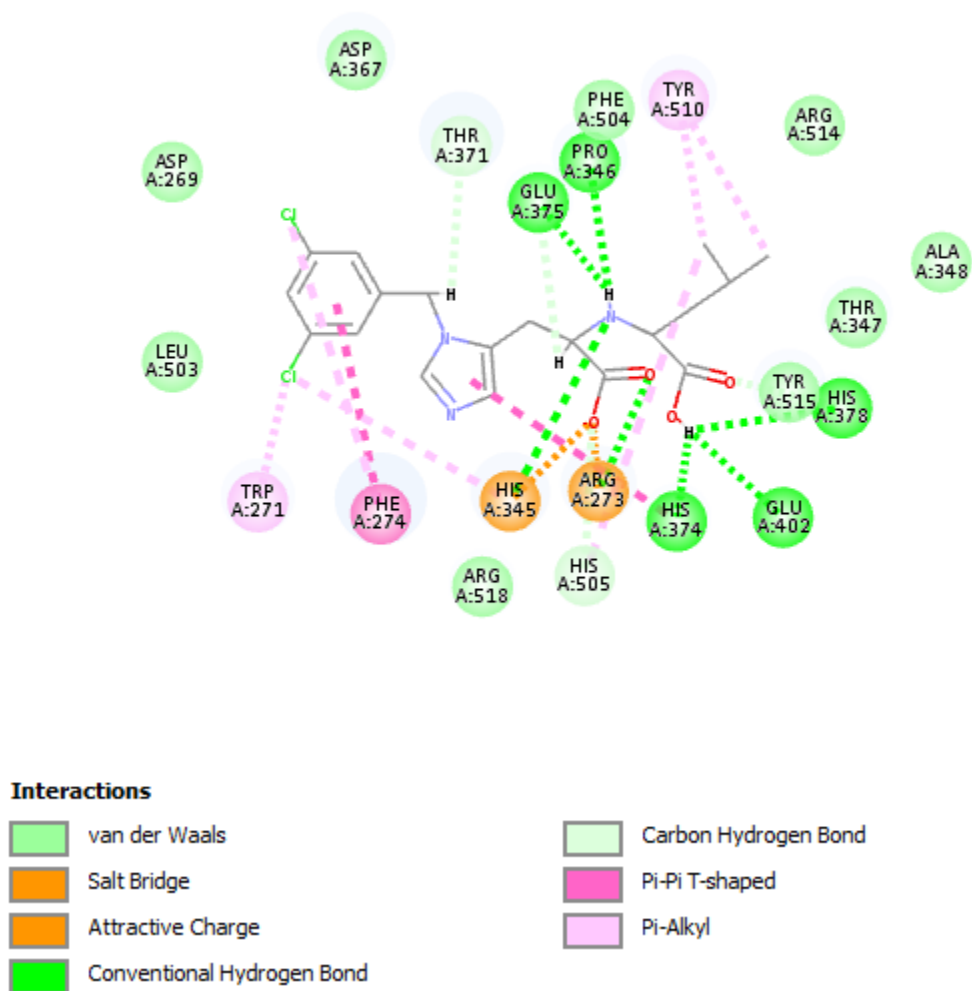



**Figure S62D** binding modes of remdesivir in SARS-CoV-2 M<sup>Pro</sup> **(A)**, SARS-CoV-2 PL<sup>Pro</sup> **(B)** and ACE2 **(C)**

**(A)**

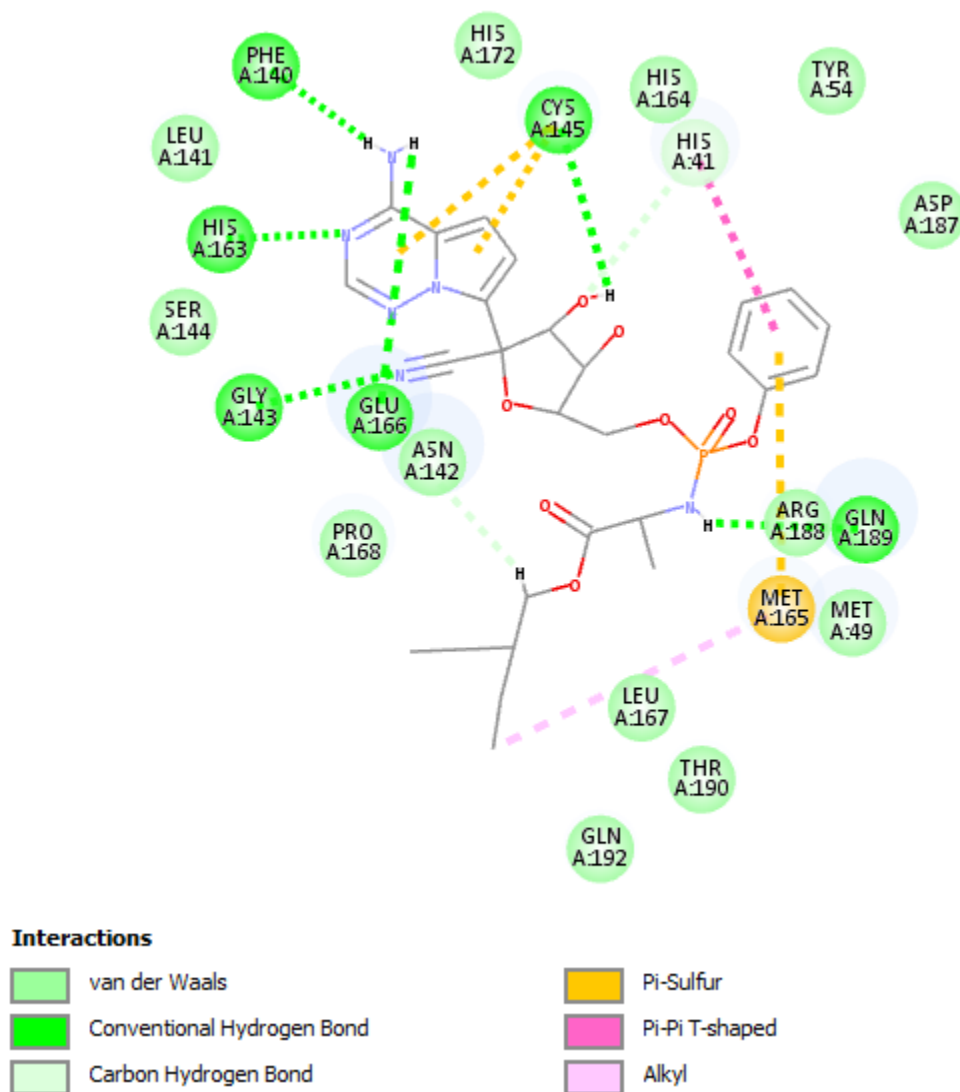

(B)

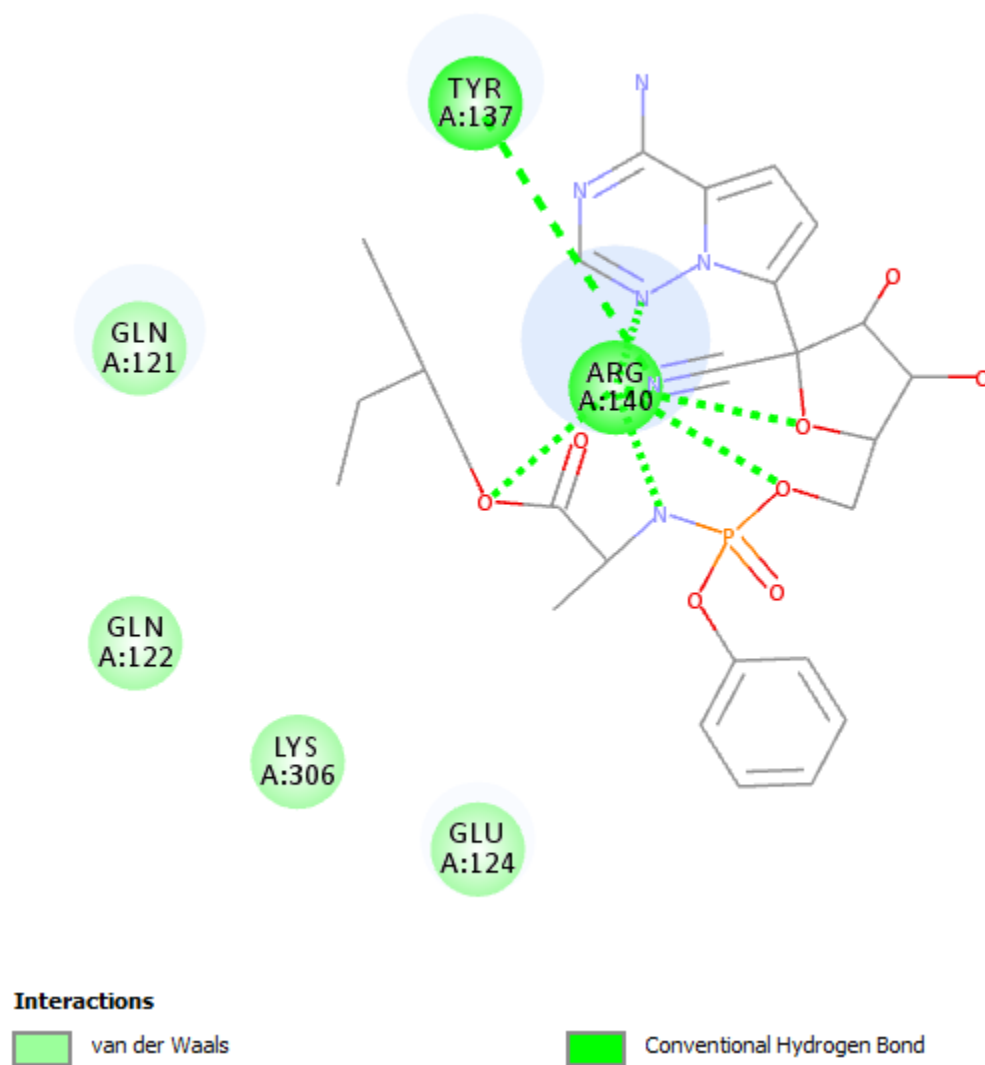

(C)

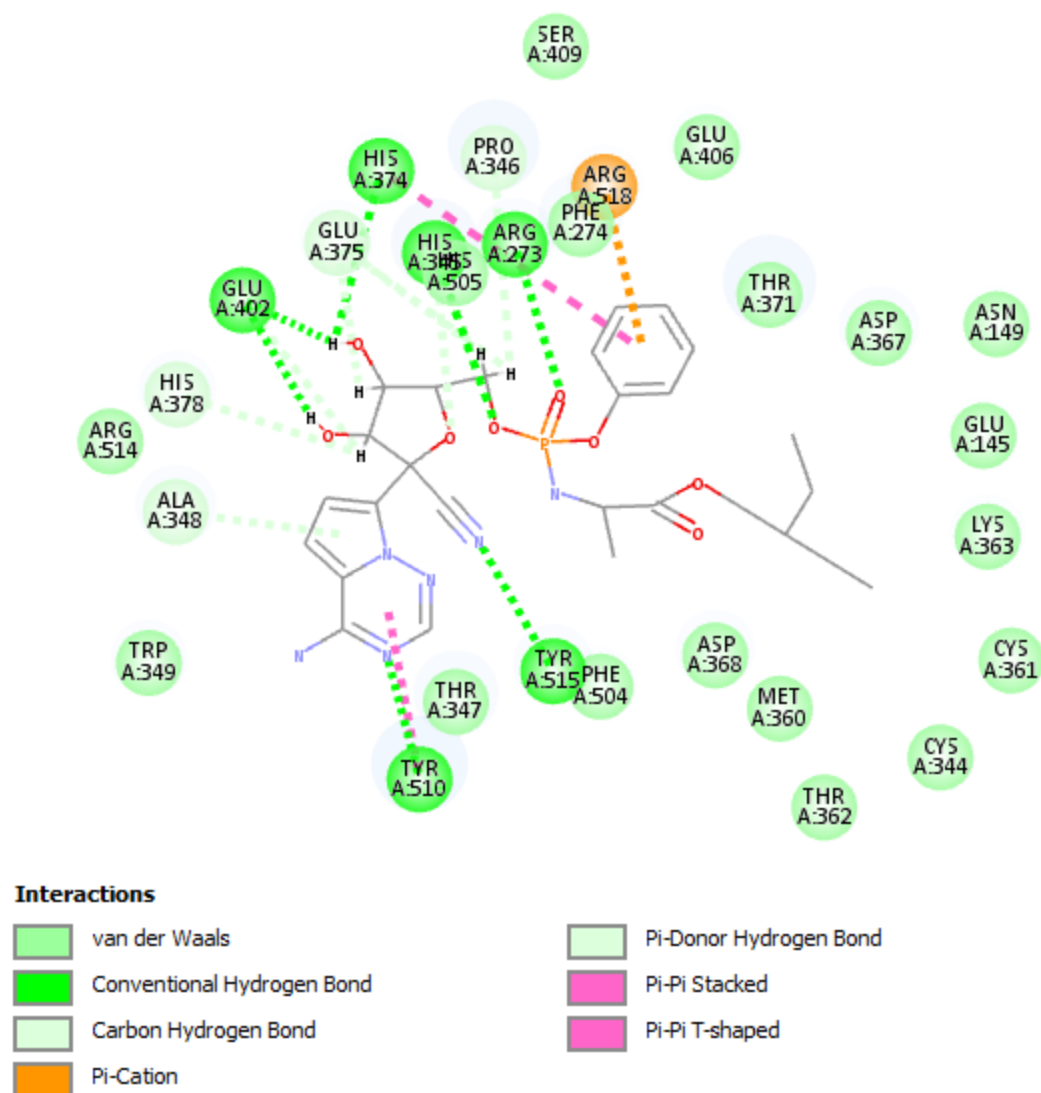

Supplement: s1 [file s1]
